## 25 **Abstract**

26 Repression is essential for coordinated cell type-specific gene regulation and for controlling the  
27 expression of transposons. In the *Drosophila* ovary, stem cells regeneration and differentiation  
28 require well-controlled expression, with de-repression leading to tissue degeneration and  
29 ovarian tumors. Additionally, the ovary is acutely sensitive to deleterious consequences of  
30 transposon de-repression. The *small ovary (sov)* locus was identified in a female sterile screen  
31 shows dramatic effects ovarian morphogenesis. We mapped the locus to the uncharacterized  
32 gene *CG14438* and reveal it encodes a zinc-finger protein that colocalizes with the essential  
33 Heterochromatin Protein 1 (HP1a). The distinct functions of Sov we report, including  
34 repression of inappropriate signaling, transposon silencing, and effects on position-effect  
35 variegation in the eye, suggest a central role in heterochromatin stabilization.

## 36 **Introduction**

38 Multicellular organisms rely on stem cells. A combination of extrinsic and intrinsic signals  
39 function to maintain the balance between self-renewal of stem cells and the differentiation of  
40 progenitors needed for tissue homeostasis and development. The *Drosophila* adult ovary is a  
41 well-studied model for development (Fuller and Spradling 2007). It is organized into ~16  
42 ovarioles, which are assembly lines of progressively maturing egg chambers. At the anterior tip  
43 of each ovariole is a structure called the germarium, harboring 2-3 germline stem cells (GSCs),  
44 which sustain egg development throughout the life of the animal. Surrounding the GSCs and  
45 their cystoblast daughters is a stem cell niche, a collection of nonproliferating somatic cells  
46 composed of terminal filament and cap cells. Like the GSCs, somatic stem cells divide to  
47 produce new stem cells and escort cells, which encase the germline. Each cystoblast is fated  
48 to differentiate and will undergo four rounds of cell division with incomplete cytokinesis to

49 produce a germline cyst interconnected by the fusome, a branched cytoskeletal structure.  
50 Germline cysts are surrounded by two escort cells. Toward the posterior of the germarium, a  
51 monolayer of somatic follicle cells replaces the escort cells to form an egg chamber.

52 Egg chamber development requires the careful coordination of distinct germline and  
53 somatic cell populations through signaling within a complex microenvironment. For example,  
54 extrinsic signals and transducers including Jak/Stat and the BMP homolog, Decapentaplegic  
55 (Dpp), are required to maintain the proliferative potential of GSCs (Bausek 2013; Gilboa 2015;  
56 S. Chen, Wang, and Xie 2011). Oriented divisions displace the primary cystoblast cell away  
57 from the stem cell preserving signals and permit the expression of differentiation factors, such  
58 as *bag-of-marbles* (*bam*). The importance of *bam* is revealed in *bam* loss-of-function mutants,  
59 resulting in tumorous germaria filled with undifferentiated germline cells containing many  
60 spectrosomes, the dot-fusome structure characteristic of GSCs and primary cystoblasts, as a  
61 result of complete cytokinesis (Lin and Spradling 1995; D. McKearin and Ohlstein 1995).  
62 Controlling this signaling requires repression in addition to activation.

63 Dynamic changes in chromatin landscapes within the germline and somatic cells are  
64 critical for oogenesis (Barton et al. 2016; X. Li et al. 2017; Börner et al. 2016; Peng et al. 2016;  
65 Soshnev et al. 2013; McConnell, Dixon, and Calvi 2012). Nucleosomes generally repress  
66 transcription by competing for DNA binding with transcription factors (Lorch and Kornberg  
67 2017; Kouzarides 2007; Jenuwein and Allis 2001). Further levels of repression depend largely  
68 on histone modifications. For example, the activities of both the H3K9 methyltransferase  
69 SETDB1, encoded by *eggless* (*egg*) (X. Wang et al. 2011; Clough et al. 2007; Clough,  
70 Tedeschi, and Hazelrigg 2014), and the H3K4 demethylase encoded by *lysine-specific*  
71 *demethylase 1* (Di Stefano et al. 2007; Rudolph et al. 2007; Eliazer, Shalaby, and Buszczak

72 2011; Eliazar et al. 2014) are required in the somatic cells of the germarium for GSC  
73 maintenance, normal patterns of differentiation, and germline development. Genome-wide  
74 profiling hints at a progression from open chromatin in germline stem cells to a more closed  
75 state during egg chamber differentiation (T. Chen and Dent 2014). Disrupting this progressive  
76 repression in the ovary could result in stem cell over-proliferation and defective development.

77 There are other roles for regulated chromatin states in oogenesis. The germline has  
78 been repeatedly hijacked to promote the vertical transmission of transposons resulting in a  
79 loss of fitness in the *Drosophila* host (Charlesworth and Langley 1989; Pelisson et al. 2002).  
80 This increased mobilization of transposons in gonads is countered by host responses, such as  
81 induced heterochromatin formation, to repress transposon activity. The proximity of condensed  
82 heterochromatin can dampen the activity of genes and transgenes (Elgin and Reuter 2013).  
83 The conserved Heterochromatin-Protein 1a (HP1a), encoded by *Su(var)205*, is critical for  
84 heterochromatin formation (James and Elgin 1986; Eissenberg et al. 1990; Clark and Elgin  
85 1992).

86 Originally described over 40 years ago (J. D. Mohler 1977), the *small ovary (sov)* locus  
87 mutants have range of phenotypes including disorganized ovariole structure, egg chamber  
88 fusions, and undifferentiated tumors, culminating in complete ovarian degeneration (Wayne et  
89 al. 1995). In the present work, we demonstrate *sov* encodes an unusually long 21 C<sub>2</sub>H<sub>2</sub> Zinc  
90 finger (ZnFs) nuclear protein that colocalizes with HP1. Previous work showed this ZnF protein  
91 in complex with HP1a (Alekseyenko et al. 2014). RNA-seq analysis shows that *sov* activity is  
92 required to repress the expression of a large number of genes in the ovary as well as  
93 transposons. Additionally, *sov* mutations are strong dominant suppressors of Position Effect  
94 Variegation (PEV) in the eye, a key characteristic of HP1 (Elgin and Reuter 2013), which is

95 consistent with Sov and HP1a colocalization in the nucleus. These data indicate that Sov is a  
96 potent repressor of gene expression.

97

## 98 **Results**

### 99 *small ovary is CG14438*

100 To localize *sov*, we used complementation of female-sterile and lethal *sov* mutations with  
101 preexisting and custom-generated deficiencies, duplications, and transposon insertions to  
102 refine previous mapping (J. D. Mohler 1977; D. Mohler and Carroll 1984). Our results (Fig  
103 1A,B) suggested that either the protein-coding *CG14438* gene or the intronic, noncoding  
104 *CR43496* gene was *sov*. The *sov* locus mapped to the non-complementing deletion *Df(1)sov*.  
105 Rescue of female sterility and/or lethality of *sov*<sup>2</sup>, *sov*<sup>ML150</sup>, *sov*<sup>EA42</sup> and *Df(1)sov* with  
106 *Dp(1;3)sn<sup>13a1</sup>* (molecularly undefined, not shown), *Dp(1;3)DC486*, and *PBac{GFP-*sov*}*  
107 confirmed our mapping. We could not replicate separability of *sov*<sup>EA42</sup> sterility and lethality with  
108 *Dp(1;3)sn<sup>13a1</sup>* (Wayne et al. 1995). Female sterile and lethal alleles of *sov* map identically.

109 We performed genome sequencing to determine if the lesions in *sov* alleles occur in  
110 *CG14439* or *CR43496* (Table S1). While *CR43496* contained three polymorphisms in *sov*  
111 alleles relative to the reference, we identified the same polymorphisms in all mutant *sov* alleles  
112 and in *sov*<sup>+</sup> alleles in *w*<sup>1118</sup> and *Oregon-R* lines. Thus, *CR43496* is highly unlikely to be *sov*. In  
113 contrast, we found disruptive mutations in *CG14438* (Fig 1C), which encodes an unusually  
114 long 3,313 residue protein with 21 C<sub>2</sub>H<sub>2</sub> ZnFs, nuclear localization motifs, and coiled-coil  
115 regions (Fig 1C). We identified a nonsense mutation (G to A at position 6,764,462) in the  
116 *CG14438* open reading frame of *sov*<sup>EA42</sup> which is predicted to truncate the *sov* protein before  
117 the ZnF domains. We found a frameshift insertion (T at position 6,769,742) located towards the

118 end of *CG14438* in *sov*<sup>2</sup> that encodes 30 novel residues followed by a stop codon within the C-  
119 terminal ZnF, as well as removing the terminal predicted NLS motif (Fig 1C). We found a  
120 missense mutation (C to G at position 6,763,888) in *sov*<sup>ML150</sup> that results in a glutamine to  
121 glutamate substitution within a predicted coiled-coil domain. While this is a conservative  
122 substitution, and while glutamate residues are common in coiled-coil domains, glutamine to  
123 glutamic acid substitutions are especially disruptive in the coiled-coil region of the sigma  
124 transcription factor (Hsieh, Tintut, and Gralla 1994). We conclude that *CG14438* is *sov*.

125

### 126 *sov* expression

127 To determine where *sov* is expressed and if it encodes multiple isoforms, we analyzed  
128 expression in adult tissues by RNA-Seq. We noted that *sov* is broadly expressed as a single  
129 mRNA isoform in adult tissues, with highest expression in ovaries (Fig 1D). The modENCODE  
130 (Graveley et al. 2011; J. B. Brown et al. 2014) and FlyAtlas (Robinson et al. 2013; Leader et al.  
131 2018) reference sets show a similar enrichment in the ovary, as well as in early embryos. The  
132 enrichment of *sov* in the ovary is consistent with its role in oogenesis.

133 To determine if and where Sov was expressed in the ovary, we examined the  
134 distribution of GFP-Sov in developing egg chambers (Fig 2A). We observed GFP-Sov signal in  
135 all cell types. By pairing localization analysis of Sov with antibodies recognizing Vasa (Vas) to  
136 label the germline (Fig 2B), we observed particularly striking nuclear localization of Sov  
137 surrounded by perinuclear Vas in the germline cells within region 1 of the germarium, with  
138 highest levels evident within the GSCs (dashed circles). We also used Traffic jam (Tj) to label  
139 the soma (Fig 2C). We observed Sov nuclear staining in the Tj positive somatic and follicle

140 stem cells (dashed ovals) (Fig 2C). These data indicate that Sov is expressed in the germline  
141 and soma in the ovary.

142

### 143 Sov function

144 To examine *sov* function in the germarium, we compared a strong allelic combination,  
145 *sov*<sup>2</sup>/*sov*<sup>EA42</sup> to cell-type specific knockdown of *sov* using a UAS short hairpin *sov* RNAi  
146 construct (P{TRiP.HMC04875}; hereafter, *sov*<sup>RNAi</sup>). The germaria of heterozygous *sov* females  
147 are wild type (Fig 3A), but the *sov* mutants often show an ovarian tumor phenotype, with  
148 greater than the expected number of germ cells with dot spectrosomes (Fig 3B), indicating that  
149 germ cells undergo complete cytokinesis. Ovarian tumors were observed in ~40% of *sov*  
150 mutants (N=12/31 *sov*<sup>EA42</sup>/*sov*<sup>2</sup> egg chambers versus N=0/47 controls). These findings are  
151 consistent with GSC hyperproliferation and/or failed differentiation. We also observed tumors  
152 and nurse cell nuclei residing within common follicles (Fig 3B) in about one-third of *sov*  
153 mutants (N=11/31 *sov*<sup>EA42</sup>/*sov*<sup>2</sup> versus N=0/24 in controls). This phenotype occurs when follicle  
154 cells either fail to separate egg chambers, or where those chambers fuse (Goode, Wright, and  
155 Mahowald 1992). In older *sov* ovaries, we observed extensive cell death (Fig S1). Additionally,  
156 we found that rare *sov*<sup>EA42</sup>/Y males that escaped lethality had no germ cells (Fig S2). Thus, *sov*  
157 functions widely.

158 To examine cell-type specific functions of *sov*, we used *tj-GAL4* to express *sov*<sup>RNAi</sup> in  
159 somatic escort and follicle cells and *nanos-GAL4* (*nos-GAL4*) to express *sov*<sup>RNAi</sup> (or  
160 *mCherry*<sup>RNAi</sup> controls) in the germline. Relative to the controls, the *tj*>*sov*<sup>RNAi</sup> germaria (Fig  
161 3C,D) were abnormal, showing ovarian tumor phenotypes similar to those seen in *sov*  
162 mutants. Germariums were often filled with germline cells with dot spectrosomes and the

163 follicle cells encroached anteriorly. Similar results were also observed using other somatic  
164 drivers (*c587-GAL4* and *da-GAL4*). Interestingly, *nos>sov<sup>RNAi</sup>* did not impaired germaria  
165 morphology (Fig 3E,F) and egg chambers representing all 14 morphological stages of  
166 oogenesis appeared phenotypically normal. However, eggs produced from *nos>sov<sup>RNAi</sup>*  
167 mothers arrested during early embryogenesis, indicating that maternal *sov* is required for  
168 embryonic development. While the expression patterns and germline RNAi suggest that *sov* is  
169 deployed in both the soma and germline, Wayne et al. (1995) reported *sov* to be somatic line  
170 dependent. We conducted a germline clonal analysis and found instead that *sov<sup>+</sup>* is required in  
171 the germline (Fig S3). Additionally, *sov<sup>RNAi</sup>* resulted in embryonic germline defects in a high-  
172 throughput study (Jankovics et al. 2014). Taken together, these data indicate that there are  
173 both somatic and germline requirements for *sov* in oogenesis.

174 To explore the differentiation of the germline further, we examined the distribution of  
175 Bam, which is expressed in germarium region 1 germ cells (D. M. McKearin and Spradling  
176 1990; D. McKearin and Ohlstein 1995; Ohlstein and McKearin 1997). In the absence of Bam,  
177 germ cells hyper-proliferate, resulting in tumors composed of 2-cell cysts. Given the  
178 prevalence of undifferentiated tumorigenic germ cells upon somatic *sov<sup>RNAi</sup>* knockdown, we  
179 asked if *sov* has a non-autonomous role in promoting Bam expression in germ cells. Indeed,  
180 somatic knockdown of *sov* results in significantly less Bam expressed in germ cells relative to  
181 controls (Fig 3G,H; Fig S4). Both *tj-GAL4>sov<sup>RNAi</sup>* and *c587-GAL4>sov<sup>RNAi</sup>* resulted in strong  
182 repression of Bam expression. Germline depletion of *sov* did not alter Bam localization (Fig  
183 S4). The reduction in Bam expression in the germline is consistent with a non-autonomous role  
184 of *Sov* function in the soma for differentiation signals directed to the germline.



185 To examine the defective follicle encapsulation of the germline cysts following *sov*  
186 depletion (resulting in fused follicles), we used the oocyte-specific expression of Oo18 RNA  
187 binding protein (Orb) (Lantz et al. 1994) to count the number of oocytes per cyst. Orb specifies  
188 the future single oocyte at the posterior of the 16-germ cell egg chamber in control egg  
189 chambers (Fig 3I, Fig S2D). When we examined ovaries where *sov* expression had been  
190 knocked down in somatic cells, we found examples of both egg chambers with either too many  
191 oocytes (Fig 3J) or no oocytes (Fig 3K, Fig S4). In a wild type 16-cell germline cyst, one of the  
192 two cells that has four ring canals becomes the oocyte, and this feature can be used to  
193 determine if extra germline divisions had occurred in cysts, or if multiple cysts were enveloped  
194 by the follicle cells. We saw that the egg chambers with multiple Orb<sup>+</sup> cells always had more  
195 than 16 germ cells, and in the example shown, all three Orb<sup>+</sup> cells had four ring canals,  
196 indicating that egg chamber fusion had occurred (Fig 3J). Taken together, we conclude that  
197 *Sov* functions in the soma to ensure the proper differentiation of the germline.

198

### 199 *Sov represses gene expression in the ovary*

200 To provide mechanistic insights into the function of *Sov*, we performed transcriptome profiling  
201 using triplicated Poly-A<sup>+</sup> RNA-seq analyses of ovaries from *sov*, *sov*<sup>RNAi</sup>, and control females.  
202 The gene expression profiles of ovaries from sterile females were markedly different from  
203 controls, primarily due to de-repression in the mutants (Fig 4A; Table S2). Among genes  
204 showing differences in expression (FDR *p*<sub>adj</sub> < 0.05), we found 1,752 genes with >4-fold  
205 increased expression in mutants, while there were only 172 genes with >4-fold decreased  
206 expression (Table S3). To explore where these de-repressed genes are normally expressed,  
207 we examined their expression in other female tissues and in testes in a set of quadruplicated

208 RNA-seq experiments (a lab resource for this and other studies; Fig 4B). Many of the genes  
209 suppressed by Sov in ovaries were highly expressed in other female tissues, or in the testis,  
210 indicating that wildtype Sov prevents ectopic gene expression.

211 To determine what types of genes are de-repressed in *sov* mutants, we performed  
212 Gene Ontology (GO)(Gene Ontology Consortium 2015) term analysis (Fig S5; Table S4). The  
213 genes with lower expression in *sov* mutants had only a few significant GO terms that were  
214 oogenic in nature (as expected given the general lack of mature eggs in *sov* mutants). For  
215 example, there was poor expression of the chorion genes that are required to build the  
216 eggshell (Orr-Weaver 1991), as well as genes required for follicle cell development. In  
217 contrast, the de-repressed genes in *sov* mutants showed that there was a significant  
218 enrichment of genes with cell signaling GO terms, including neuronal communication. We  
219 found that many genes repressed by Sov in the ovary are indeed expressed in the head. For  
220 example, the *heartless (htl)* locus, which encodes a FGFR tyrosine kinase receptor important  
221 for neuron/glia communication (Stork et al. 2014), was de-repressed in *sov* ovaries and highly  
222 expressed in the head (Fig 4C). This intriguing result suggests that *sov* normally functions to  
223 repress a host of signaling pathways. This de-repressed signaling in *sov* mutants is likely  
224 catastrophic for communication between various somatic cells and the germline during egg  
225 chamber development. This could well explain the variety of mutant phenotypes observed in  
226 *sov* mutants.

227 The general repressive role of *sov* was also revealed by a dramatic and coherent  
228 elevation of transposon expression in the mutants (Fig 4D; Table S3). 138 transposable  
229 element classes were detected in our gene expression profiling of *sov* mutants and controls.  
230 Of these, 91 had increased expression (FDR  $p_{adj} < 0.05$ ) >4-fold in *sov* mutants, while none

231 had >4-fold decreased expression. The DNA, LINE, and LTR families of transposable  
232 elements were all de-repressed in *sov* mutants. Interestingly, the somatic knockdown of *sov*  
233 resulted in the most dramatic de-repression of the *gypsy* and *copia* classes of transposons,  
234 which are *Drosophila* retroviruses that develop in somatic cells and are exported to the  
235 developing germline (Yoshioka et al. 1990). Thus, wild type *sov* may be important to protect  
236 the germline from infection. Equally interesting, germline knockdown resulted in greatest de-  
237 repression of the *HeT-A*, *TAHRE*, and *TART* transposons that compose the telomere (Mason,  
238 Frydrychova, and Biessmann 2008). Poorly formed telomeres result in loss of material from  
239 chromosome ends and telomere fusion, which results in poor anaphase separation and  
240 aneuploidy (Cenci, Ciapponi, and Gatti 2005). This finding suggests that the general role of  
241 *sov* in silencing transposon expression includes control of both transposon functions  
242 necessary for normal cellular metabolism, exemplified by the telomere transposons, as well as  
243 detrimental activities of retrovirus-like elements. In addition to widespread dis-regulation of  
244 signaling and development pathways in *sov* mutants, transposon dysgenesis may contribute to  
245 the severe defects in *sov* ovarian development.

246

#### 247 *Sov is a Suppressor of PEV and co-localizes with HP1*

248 The repressive function of *Sov* is reminiscent of *HP1a* function as general repressor of gene  
249 expression. *HP1a* was first characterized in *Drosophila* as a suppressor of *PEV*, a process that  
250 reduces gene expression due to spreading of heterochromatin into a gene region (Clark and  
251 Elgin 1992). To test the hypothesis that *sov* negatively regulates gene expression by  
252 promoting heterochromatin formation, we examined the role of *sov* in *PEV* in the eye, where  
253 patches of *white*<sup>+</sup> (red pigmented) and *white*<sup>-</sup> (not red pigmented) eye facets are easily

254 observed (Fig 5A). If, like HP1a, Sov represses gene expression by promoting  
255 heterochromatin formation (Eissenberg et al. 1990), then it should suppress PEV, which would  
256 be seen as increased eye pigmentation. We obtained five different variegating  $w^+$  transgene  
257 insertions associated with either the heterochromatic pericentric region of chromosome arm 2L  
258 or spread along the length of the heterochromatin-rich chromosome 4. In control animals,  
259 these insertions show a characteristic eye variegation pattern (Fig 5B). Consistent with the  
260 allelic strengths seen in previous experiments, the weak  $sov^2$  allele did not suppress PEV (Fig  
261 5C) but the stronger  $sov^{ML150}$ ,  $sov^{EA42}$ , and  $Df(1)sov$  mutations dominantly suppressed PEV  
262 (Fig 5D–F). These data demonstrate a role for Sov in heterochromatin formation.

263         The strong repressive function of Sov is reminiscent of HP1. If Sov is in complex with  
264 HP1a (Alekseyenko et al. 2014), then Sov and HP1 should colocalize in cells. To see if this  
265 was true, we followed HP1a-RFP and GFP-Sov localization in 1–2 hr live embryos where both  
266 are abundantly expressed (Rudolph et al. 2007). During *Drosophila* cleavage, nuclei undergo  
267 rapid synchronous nuclear divisions prior to cellularization at cleavage division/nuclear cycle  
268 (NC) 14 (Foe and Alberts 1983). HP1a and Sov colocalized in all NC 10–12 embryos we  
269 examined (Fig 6A; N=7 embryos). During prophase, both HP1a and Sov were enriched in  
270 regions of condensed DNA (Fig 6A, 4:30). Whereas low levels of HP1a decorated DNA  
271 throughout division, Sov was depleted during mitosis (Fig 6A, 10:00 and 11:10). Upon re-entry  
272 into interphase, Sov localization to nuclei resumed and was coincident with HP1a. Formation  
273 of heterochromatin is contemporaneous with or slightly precedes HP1a apical subnuclear  
274 localization in NC 14 (Rudolph et al. 2007; Yuan and O'Farrell 2016). At this stage, we  
275 observed a strong colocalization of HP1a and Sov. Measuring the distribution of HP1a and Sov  
276 (Fig 6B,B') confirmed high levels of colocalization within HP1a subnuclear domains (Fig 6C,

277 shaded region). These data support the idea that HP1a and Sov are deposited maternally  
278 where they assemble into a complex.

279

## 280 **Discussion**

### 281 Sov is a novel heterochromatin-associated protein

282 Genomes contain large blocks of DNA of potentially mobile transposons and immobile mutated  
283 derivatives (Vermaak and Malik 2009). The cell keeps these transposons from wreaking havoc  
284 on the genome by actively suppressing their expression through condensation into  
285 heterochromatin. However, some tightly regulated expression from heterochromatin is required  
286 for normal cellular function. For example, the telomeres of *Drosophila* are maintained by  
287 transposition of mobile elements from heterochromatic sites (Mason, Frydrychova, and  
288 Biessmann 2008), and histone and rRNA genes are located within heterochromatic regions  
289 (Yasuhara and Wakimoto 2006). Weakening of heterochromatin by suppressors of variegation  
290 results in de-repression of gene expression at the edges of heterochromatin blocks,  
291 suggesting that the boundaries between repressed and active chromatin can expand and  
292 contract (Weiler and Wakimoto 1995; Reuter and Spierer 1992). HP1a, encoded by  
293 *Su(var)205*, is a central component of heterochromatin (Ebert et al. 2006) that shows the same  
294 strong suppression of variegation that we observed in *sov*/+ flies. Similarly, HP1a is also  
295 required to repress the expression of transposons (Vermaak and Malik 2009).

296       Repression is often stable and emerging themes suggest a robust set of activities,  
297 rather than a single component, maintain a chromatin state. For example, long-term repression  
298 is stabilized with complexes, such as the repressive Polycomb Group (PcG) which provides an  
299 epigenetic memory function (Kassis, Kennison, and Tamkun 2017). In order to create a stable

300 epigenetic state, the PcG complexes have subunits that modify histones and subunits that bind  
301 these modifications. In addition to being tethered to the chromatin via histones, the PcG  
302 complexes also include DNA-binding proteins, such as the YY1-like ZnF protein Pleiohomeotic  
303 (Pho) that further reinforce localization. The DNA anchor proteins in PcG complexes are at  
304 least partially redundant with the histone-binding components (J. L. Brown et al. 2003),  
305 suggesting that localization is robust due to multiple independent localization mechanisms.

306 In mammals, HP1a also has both histone and DNA anchoring. DNA anchors are  
307 provided by a family of KRAB ZnF proteins that have undergone a massive radiation during  
308 evolution (Yang, Wang, and Macfarlan 2017; Ecco, Imbeault, and Trono 2017). KRAB proteins  
309 are essential for repression of transposons and more generally for a properly regulated  
310 genome. The KRAB family members use a KRAB-Associated Protein (KAP1) adapter protein  
311 to associate with HP1a and the SETDB1 methylase that modifies histones to enable HP1a  
312 binding (Fig 7). Although KRAB proteins have not been identified in *Drosophila*, the *Drosophila*  
313 *bonus* (*bon*) gene encodes a KAP1 homolog (Beckstead et al. 2005). *Drosophila* also has a  
314 SETDB1 encoded by *egg*, and loss of *egg* results in ovarian phenotypes reminiscent of those  
315 observed in *sov* loss-of-function females (Clough et al. 2007; Clough, Tedeschi, and Hazelrigg  
316 2014; X. Wang et al. 2011). Like *sov* and HP1a, *bon* is a modifier of variegation, raising the  
317 possibility that they collectively coordinate gene regulation. In support of this hypothesis, *Bon*,  
318 *Sov*, and *Egg* were all identified in the same biochemical complex as HP1a (Alekseyenko et al.  
319 2014). It is tempting to speculate that the single very long and ZnF-rich *Sov* protein plays the  
320 same direct tethering role as the large family of KRAB ZnF proteins in mammals (Fig 7). If *Sov*  
321 uses subsets of fingers to bind DNA, it could localize to many different sequences in a  
322 combinatorial fashion. Additionally, the complex containing *Sov* and HP1a also contains RNA

323 (Alekseyenko et al. 2014) and could act as a tether via a series of RNA intermediates as  
324 occurs in sex chromosome inactivation, for example (J. T. Lee 2009). As in the case of Pho in  
325 the PcG complexes, Sov might be a robustness factor rather than an absolute requirement, as  
326 we did not observe gross delocalization of HP1a following *sov*<sup>RNAi</sup> (not shown). Further work  
327 will be required to fully understand the relationship between Sov and HP1a.

328

### 329 Repression by Sov promotes germline differentiation

330 The fact that there have been many female sterile alleles of *sov* isolated suggests that  
331 the ovary is particularly sensitive to reduced *sov* activity. The female sterility phenotype is  
332 complex and somewhat variable, but partial *sov* loss of function is characterized by somatic-  
333 dependent differentiation defects. Phenotypes include defective follicle cell encasement of egg  
334 chambers, resulting in follicles with multiple oocytes, and accumulation of germline tumor cells  
335 that undergo complete cytokinesis instead of forming mature and differentiated 16-cell egg  
336 chambers. Stronger alleles also show a germline-dependent block in development and  
337 lethality. Diverse functions sometimes result from isoform and/or localization diversity. While  
338 *sov* functions seem diverse, the locus expresses a single major isoform and Sov seems to be  
339 consistently located in the nucleus. It is more likely that one mechanism account for all *sov*  
340 function. We suggest that Sov in regulates the chromatin landscape that helps repress stem  
341 cell identity and promote differentiation. This same mechanism represses ectopic signaling and  
342 tissue-inappropriate responses in the ovary, controls heterochromatin formation in the eye and  
343 represses transposons.

344 We observed dramatic de-repression of transposons in *sov* mutants. In addition to our  
345 observations, Czech et al (2013) found evidence for a role of *sov* in transposon repression in a

346 genome-wide screen. Transposon repression raises the possibility that Sov interacts with the  
347 Piwi pathway (Brennecke et al. 2007; Yin and Lin 2007; Teixeira et al. 2017) which directly  
348 interacts with HP1a to facilitate heterochromatin formation and promote transposon silencing  
349 (Brower-Toland et al. 2007; S. H. Wang and Elgin 2011). However, genes involved more  
350 strictly with transposable element regulation, such as Piwi, do not have strong dosage effects  
351 on PEV (Gu and Elgin 2013), while *sov* and *HP1a/Su(var)205* do. This distinction suggests  
352 that Sov has a more general effect on heterochromatin, rather than specificity for transposon  
353 repression. Nevertheless, interplay between Piwi, Sov, and HP1a remains possible.

354

### 355 Conclusions

356 Our data show that *sov* encodes a repressor of gene expression and transposons in the  
357 ovary. In the absence of *sov*, genes that are normally expressed at very low levels in ovary,  
358 are activated. These same genes show dynamic patterns of expression in other adult tissues,  
359 suggesting that they are de-repressed in the absence of Sov. The failure to restrict gene  
360 expression results in a range of phenotypes including ovarian tumors, defective oogenesis,  
361 and tissue degeneration. These data support the idea that Sov encodes a novel and essential  
362 protein that is generally repressive, possibly via interactions with HP1a.

363

### 364 **Materials and Methods**

365 We have adopted the FlyBase-recommended resources table which includes all genetic,  
366 biological, cell biology, genomics, manufactured reagents and algorithmic resources used in  
367 this study (Table S5).

368



369 Flies and genetics

370 The *small ovaries* (*sov*) locus was defined by three non-complementing female sterile  
371 mutations including *sov*<sup>2</sup>, which mapped to ~19 cM on the X chromosome in the 5D5-6;6E4-5  
372 interval (D. Mohler and Carroll 1984; J. D. Mohler 1977), refined to 6BD (Wayne et al. 1995).  
373 Cook *et al.* (2012) placed *sov* in the 4-gene *CG14438–shf* interval (Fig. 1; Table S5). *sov*  
374 mutations complemented *shf*<sup>2</sup>, but not *P{SUPor-P}sov*<sup>KG00226</sup> and *P{GawB}sov*<sup>NP6070</sup>,  
375 suggesting that *CG14438* or *CR43496* were *sov*, which we confirmed by generating *Df(1)sov*  
376 (X:6756569..6756668; 6770708, 6C12;6C13) as a FLP-induced recombination event between  
377 *P{XP}sov*<sup>d07849</sup> and *PBac{RB}e03842* (Parks et al. 2004; Cook et al. 2012) to remove only  
378 *CG14438* and *CR43496*.

379 We used the dominant female sterile technique for germline clones (Chou and Perrimon  
380 1996). Test chromosomes were free of linked lethal mutations by male viability (*sov*<sup>2</sup>) or rescue  
381 by *Dp(1;3)DC486* (*sov*<sup>EA42</sup> and *Df(1)sov*), were recombined with *P{ry<sup>+t7.2</sup>=neoFRT}19A*, and  
382 verified by complementation tests and PCR. We confirmed *P{ry<sup>+t7.2</sup>=neoFRT}19A* functionality  
383 by crossing to *P{w<sup>+mC</sup>=GMR-hid}SS1*, *y<sup>1</sup> w<sup>\*</sup> P{ry<sup>+t7.2</sup>=neoFRT}19A*; *P{w<sup>+m\*</sup>=GAL4-ey.H}SS5*,  
384 *P{w<sup>+mC</sup>=UAS-FLP.D}JD2* and scoring for large eye size. We crossed females with FRT  
385 chromosomes to *P{w<sup>+mC</sup>=ovoD1-18}P4.1*, *P{ry<sup>+t7.2</sup>=hsFLP}12*, *y<sup>1</sup> w<sup>1118</sup> sn<sup>3</sup>*  
386 *P{ry<sup>+t7.2</sup>=neoFRT}19A/Y* males for 24 hours of egg laying at 25°C. We heat-shocked for 1hr at  
387 37°C on days 2 and 3. We dissected females (5d post-eclosion) to score for *ovo*<sup>D1</sup> or wildtype  
388 morphology.

389 We generated *PBac{GFP-sov}* from P[acman] BAC clone CH322-191E24 (X:6753282--  
390 6773405) (Venken et al. 2009) grown in the SW102 strain (Warming et al. 2005). In step one,  
391 we integrated the positive/negative marker CP6-RpsL/Kan (CP6 promoter with a bi-cistronic

392 cassette encoding the RpsL followed by the Kan) between the first two codons of *sov*, and  
393 selected (15 µg/ml Kanamycin). We integrated at the *galk* operon in DH10B bacteria using  
394 mini-lambda-mediated recombineering (Court et al. 2003). We amplified DH10B::CP6-  
395 RpsL/Kan DNA using primers N-CG14438-CP6-RN-F and -R. Correct events were identified  
396 by PCR, as well as resistance (15 µg/ml Kanamycin) and sensitivity (250 µg/ml Kan). In step  
397 two, we replaced the selection markers with a multi-tag sequence (Venken et al. 2011),  
398 tailored for N-terminal tagging (N-tag) and counter-selected (250 µg/ml Kanamycin). The N-tag  
399 (3xFlag tag, TEV protease site, StrepII tag, superfolder GFP, FIAsh tetracysteine tag, and  
400 flexible 4xGlyGlySer (GGs) linker) was *Drosophila* codon optimized in a R6Kγ plasmid. We  
401 transformed plasmid into EPI300 for copy number amplification. We confirmed correct events  
402 by PCR and Sanger DNA sequencing. Tagged P[acman] BAC clone DNA was injected into *y*<sup>1</sup>  
403 *M}{vas-int.Dm}ZH-2A w\**; *PBac}{y+-attP-3B}*<sup>VK00033</sup> embryos, resulting in *w*<sup>1118</sup>; *PBac}{y[+mDint2]*  
404 *w*<sup>+mC=FTSF.GFP-*sov*}<sup>VK00033</sup>.</sup>

405

#### 406 Microscopy

407 We fixed ovaries in 4 or 5% EM-grade paraformaldehyde in PBS containing 0.1 or 0.3%  
408 Triton X-100 (PBTX) for 10-15min, washed 3x 15 min in PBTX, and blocked >30min in 2%  
409 normal goat serum, 0.5-1% bovine serum albumin (BSA) in PBS with 0.1% Tween-20 or 0.1%  
410 Triton X-100. Antibodies and DAPI were diluted into blocking buffer. We incubated in primary  
411 antibodies overnight at 4 °C and secondaries 2–3hr at room temperature. Embryos (1–2 hr)  
412 were prepared for live imaging in halocarbon oil (Lerit et al. 2015). We imaged ovaries and  
413 embryos using a Nikon Ti-E system or Zeiss LSM 780 microscope and eyes with a Nikon SMZ.  
414

## 415 DNA-Seq

416 Genomic DNA was extracted from 30 whole flies per genotype (Huang, Rehm, and  
417 Rubin 2009)(Sambrook and Russell 2006) to prepare DNA-seq libraries (Nextera DNA Library  
418 Preparation Kit). We used 50 bp, single-end sequencing (Illumina HiSeq 2500, CASAVA base  
419 calling). Sequence data are available at the SRA (SRP14438). We mapped DNAseq reads to  
420 FlyBase r6.16 genome with Hisat2 (-k 1 --no-spliced-alignment)(Kim, Langmead, and Salzberg  
421 2015). We used mpileup and bcftools commands from SAMtools within the genomic region  
422 X:6756000–6771000 (H. Li et al. 2009; H. Li 2011) for variant calling and snpEFF to determine  
423 the nature of variants in *sov* mutants (Cingolani et al. 2012).

424

## 425 RNA-Seq

426 Stranded PolyA+ RNA-seq libraries from *sov* and control ovaries (Table S5) were  
427 created (H. Lee, Cho, et al. 2016) and are available at GEO (GSE113977). We extracted total  
428 RNA (Qiagen RNeasy Mini Kit) in biological triplicate from 15 ovaries (4-5d post-eclosion) and  
429 used 200 ng with 10 pg of ERCC spike-in control RNAs (pools 78A or 78B) for libraries (Jiang  
430 et al. 2011; Zook et al. 2012; Pine et al. 2016; H. Lee, Pine, et al. 2016). We used 50 bp,  
431 single-end sequencing as above. Tissue expression analysis are from GEO accession  
432 GSE99574, a resource for comparing gene expression patterns.

433 We mapped RNA-seq reads to FlyBase r6.21 with Hisat2 (-k 1 --rna-strandness R --  
434 dta)(Kim, Langmead, and Salzberg 2015). We determined read counts for each attribute of the  
435 FlyBase r6.21 GTF file (with ERCC and transposable element sequences), with HTSeq-count  
436 (Anders, Pyl, and Huber 2015). Transposon sequences were from the UCSC Genome  
437 Browser RepeatMasker track (Casper et al. 2018; Smit, Hubley, and Green 2013-2015).

438 We conducted differential expression analysis with DESeq2 (pAdjustMethod = "fdr")  
439 (Love, Huber, and Anders 2014). We removed genes with read counts  $\leq 1$  and read counts for  
440 transposable elements with  $> 1$  location were summed for the DESeq2 analysis. *Df(1)sov/sov<sup>2</sup>*  
441 replicate 3 and *sov<sup>2</sup>/w<sup>1118</sup>* replicate 1 were failed. For sov mutant vs. control DESeq2 analysis,  
442 all sov mutants were compared to all wild type controls. For tissue types, we compared each  
443 sexed tissue to sexed whole organism. We used reads per kb per million reads (RPKM) for  
444 gene-level expression.

445 For heatmaps, we calculated Euclidean distance, performed hierarchical cluster  
446 analysis (agglomeration method = Ward), and mean-subtracted scaled across genotypes.  
447 Mean sample RPKM correlation values (Table S1) were calculated by cor.test() function with  
448 Pearson correlation coefficient in R (R Core Team 2017). We represented de-repressed genes  
449 as mean-subtracted scaled values across tissues in the heatmap (Table S6).

450 For read density tracks, replicate raw read files were combined. Bedgraph files were  
451 created with bedtools genomecov (Quinlan and Hall 2010) visualized on the UCSC genome  
452 browser (Kent et al. 2002). Tracks were scaled by the number of reads divided by total reads  
453 per million.

454 We used ClueGO (Bindea et al. 2009), with Cytoscape (Shannon et al. 2003) for one-  
455 sided enrichment analysis (see Table S4).

456 Images were assembled using ImageJ and Photoshop. We used ROI tool in ImageJ,  
457 plotted/analyzed image data (Microsoft Excel and GraphPad Prism), and calculated  
458 significance by D'Agnostino and Pearson normality tests, followed Student's two-tailed t-test or  
459 Mann-Whitney tests.

460

461 **Acknowledgements**

462 We thank Astrid Haase, Nasser Rusan, the Oliver and Lerit labs, and Dawson Mohler  
463 (deceased) for stimulating discussions. We used resources from FlyBase, The Hybridoma  
464 Bank, and the NIH biowulf (Table S5). This research was supported in part by the Intramural  
465 Research Program of the NIH, NIDDK to BO; NIH Grant 5K22HL126922-02 to DAL; NIH  
466 Graduate Partners Program to LB; Baylor College of Medicine, the Albert and Margaret Alkek  
467 Foundation, the McNair Medical Institute at The Robert and Janice McNair Foundation, the  
468 Cancer Prevention and Research Institute of Texas (R1313), and NIH grant 1R21HG006726 to  
469 KJTV; and NIH grants P40OD018537 and R24RR014106, and the National Science  
470 Foundation DBI-9816125 to KRC.

471

472 **Author contributions**

473 LB, KC, BO, and DAL designed the project and analyzed data. LB, KC, CW, and KJTV  
474 performed genetics. LB and HY performed genomics. LB, EAC, CW and DAL performed  
475 imaging. LB, BO, and DAL wrote the manuscript. All authors reviewed data and provided  
476 feedback on the manuscript.

477

Benner\_Fig1

### A Annotation

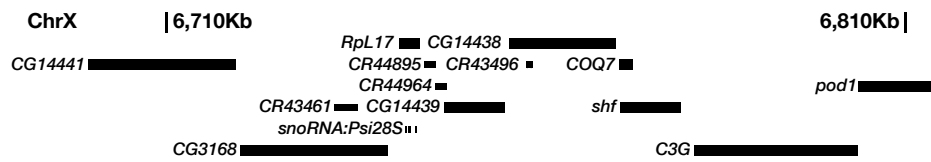

### B Mapping

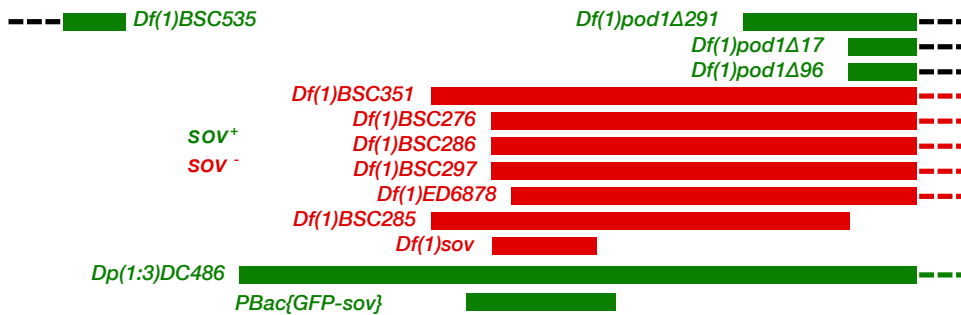

### C Locus

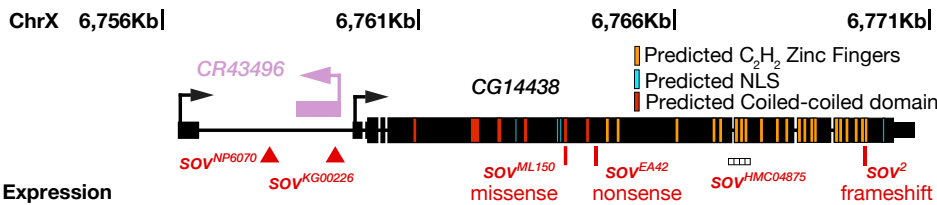

### D Expression

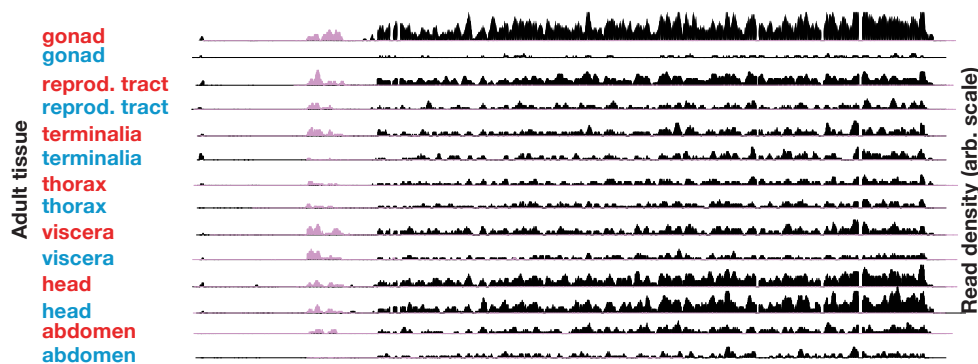

478

479

480

481

482

483

484

485

486

487

**Figure 1. *sov* is CG14438.** (A) Genes of the genomic interval X:6710000–6810000 (Gramates et al. 2017). (B) Deficiency (*Df*) and Duplication (*Dp*) mapping. (C) Schematic of the *CG14438* (black) and *CR43496* (purple) genes. Transcription start (bent arrows), introns (thin lines) non-coding regions (medium lines) and coding regions (thick lines) are shown. Transposon insertions (triangles), point mutations (red lines), the region targeted by the shRNAi transgene (base-paired), and *Sov* protein features are shown. Non-complementing (*sov*<sup>-</sup>, red) and complementing (*sov*<sup>+</sup>, green) alleles and rearrangements are shown. (D) RNA expression tracks by tissue type from female (red) or male (blue) adults.

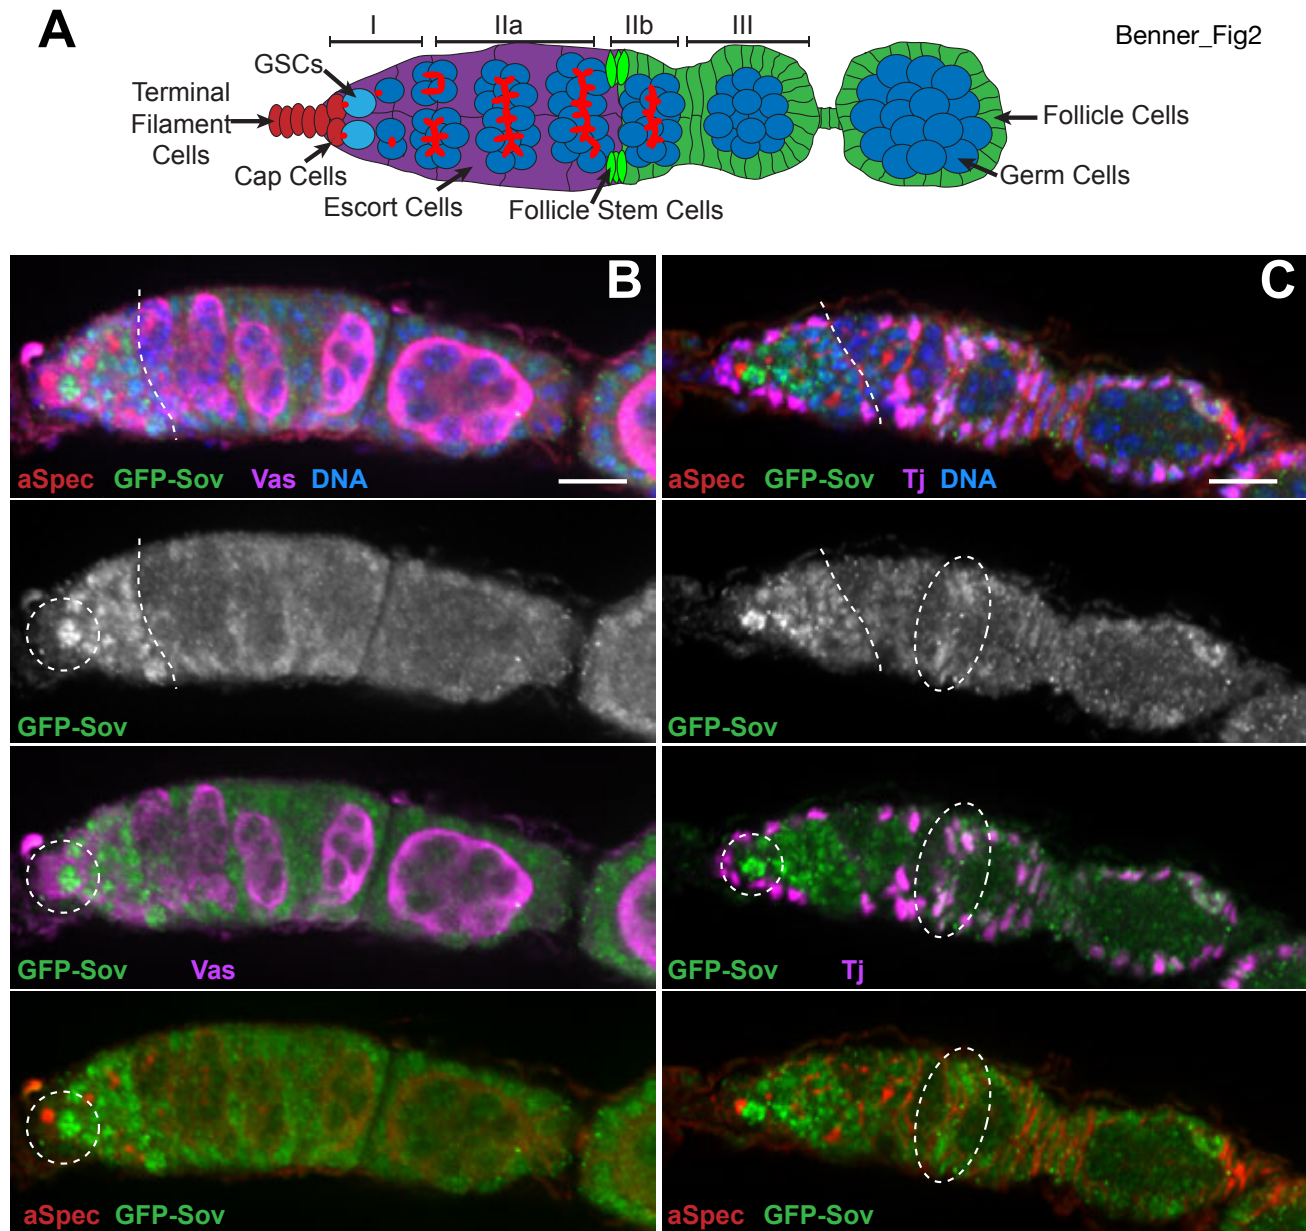

488  
489  
490  
491  
492  
493  
494

**Figure 2. Sov gerarium expression.** (A) Cartoon showing gerarium regions I-III and young egg chamber with cell types. (B,C) 1d post-eclosion, visualized for GFP-Sov (green), anti- $\alpha$ Spectrin (red). Images show single optical sections. (B) Sov contrasted with anti-Vas germline (magenta), or (C) -Tj somatic staining (magenta). GFP-Sov expression regions of interest (see text) are shown (dashed lines). Bars: 10 $\mu$ m.

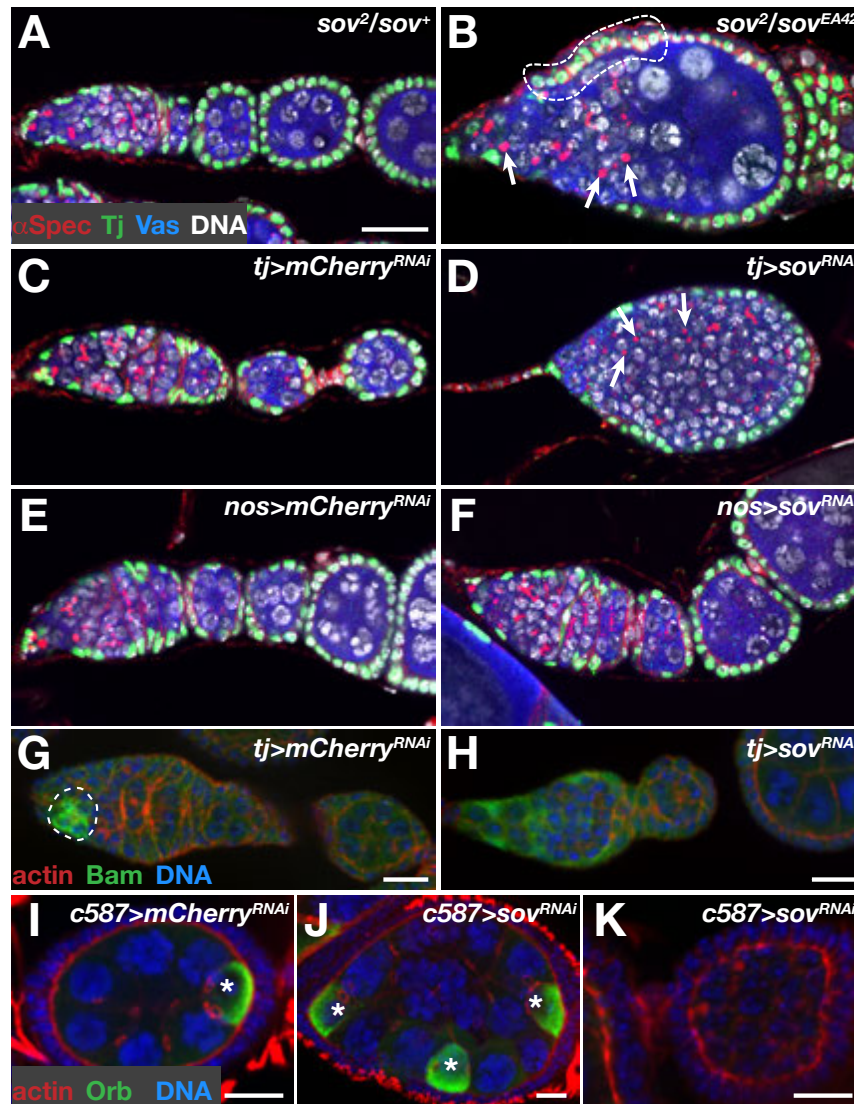

495  
496 **Figure 3. *sov* mutant defects.** (A-K) images of indicated genotype (white). (A-F) Germaria (4-  
497 5d post-eclosion) of stained with anti-Vas (blue), -Tj (green), - $\alpha$ Spectrin (red), and DAPI  
498 (white). Dot spectrosomes (arrows) and displaced follicle cells (dashed lines) are shown.  
499 Images are single optical sections. (G, H) Germaria (1d post-eclosion) stained with anti-Bam  
500 (green), -actin (red), and DAPI (blue). Bam region of interest is shown (dashed lines). (I-K)  
501 Germaria (1d post-eclosion) anti-Orb (green), -actin (red), and DAPI (blue). Orb+ cells shown  
502 (\*). Single optical sections (A-H) and maximum intensity projections (I-K). Bars: (A-F) 20 $\mu$ m,  
503 (G-K) 10 $\mu$ m.  
504



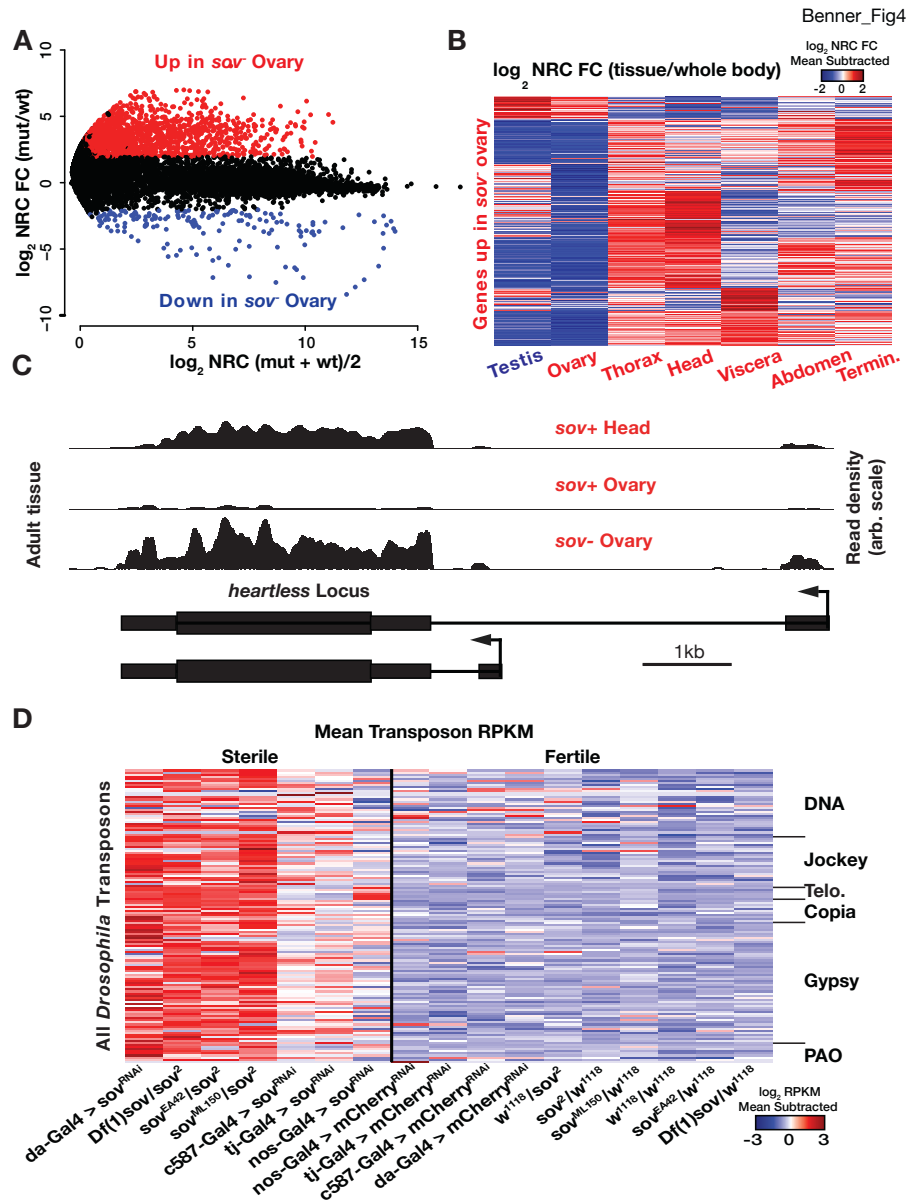

505 **Figure 4. *sov* mutant transcriptome.** (A) Relative expression in *sov* mutant vs *sov*<sup>+</sup> ovaries  
 506 plotted against the mean expression in both sample types. Units are Log<sub>2</sub> normalized read  
 507 counts (NRC). Data points are genes, those with >4-fold change (log<sub>2</sub> 2, red) or <-4 (log<sub>2</sub> -2,  
 508 blue) and FDR *p*<sub>adj</sub> value <0.05 are highlighted. (B) Tissue-biased expression in wildtype for  
 509 genes de-repressed in *sov* mutant ovaries. Heatmap from mean-subtracted ratios scaled  
 510 across tissues (red=higher; blue=lower). (C) The *heartless* locus (see Fig1 for format) showing  
 511 RNA-seq normalized read densities of *sov*<sup>+</sup> from head and *sov*<sup>+</sup> or *sov*<sup>-</sup> ovarian tissues. (D)  
 512 Transposable element expression in *sov* mutants and control alleles (as indicated). Heatmap  
 513 from mean-subtracted reads (in RPKM. red=higher; blue=lower) scaled for each transposable  
 514 element (rows) across genotypes (columns). Some element subtypes are shown for DNA, non-  
 515 LTR (Jockey), telomeric repeat (Telo), and LTR (Gypsy, Copia, and PAO) are indicated.  
 516

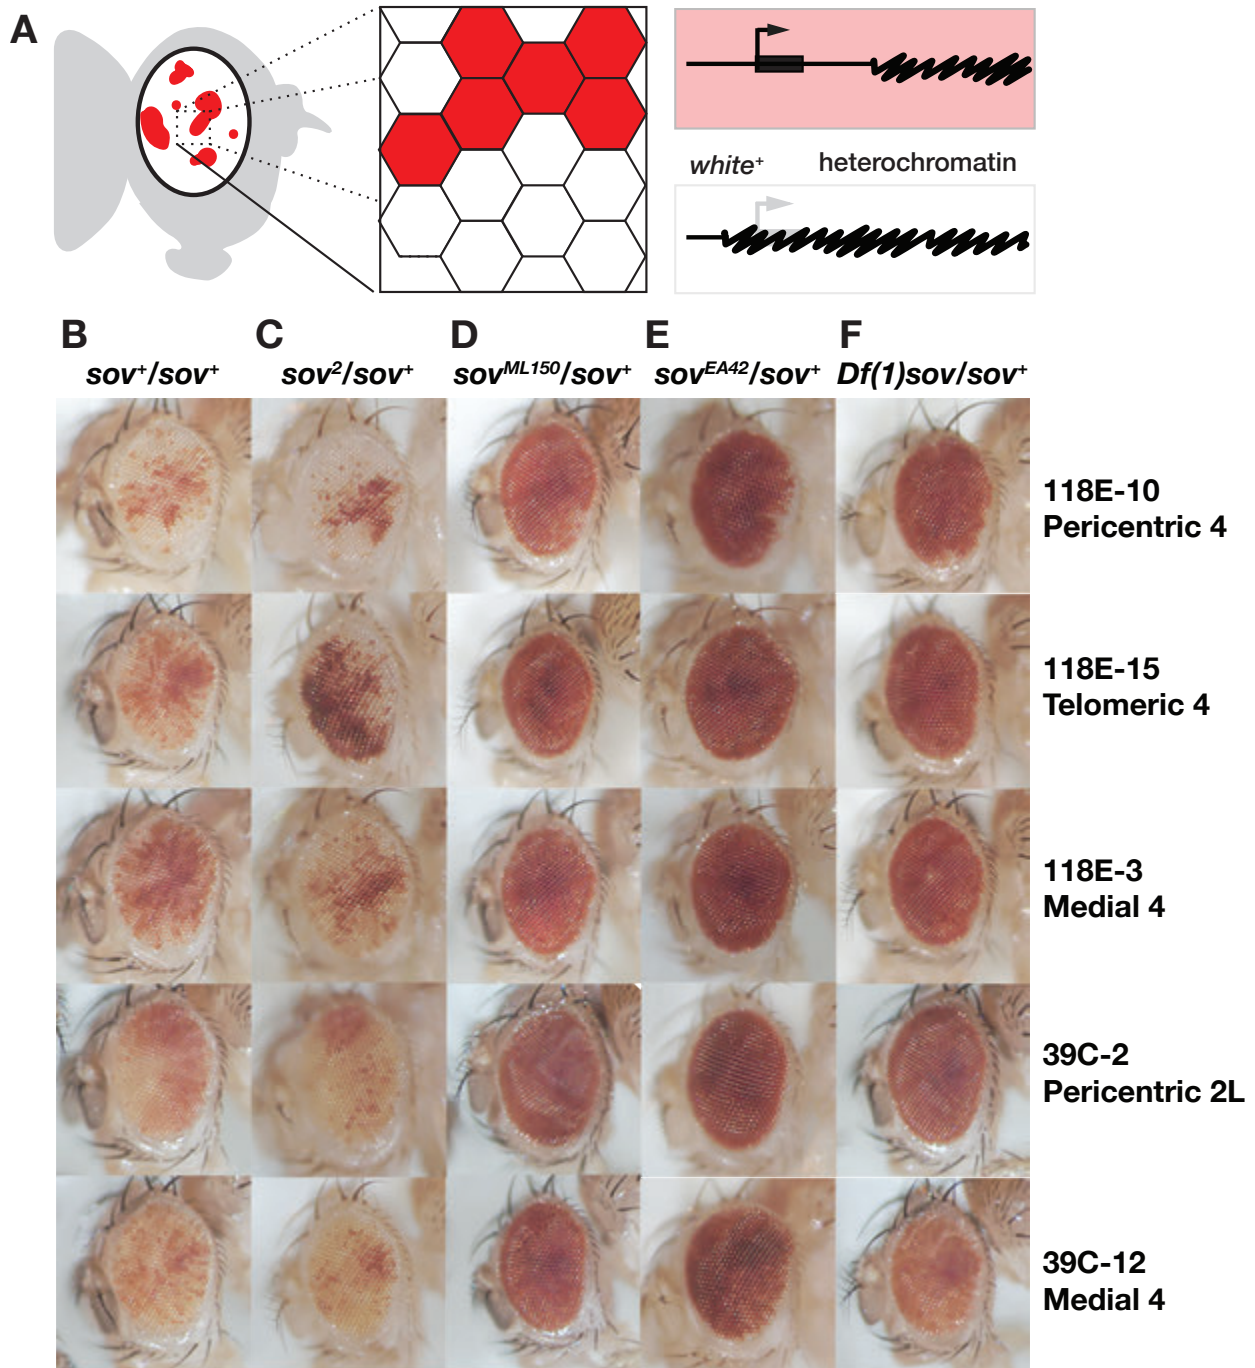

517  
518  
519  
520  
521  
522  
523

**Figure 5. Sov is a dominant suppressor of position effect variegation.** (A) Cartoon of position effect variegation (PEV) in the eye. Expression of the *white* gene (bent arrow, thick bar, red) near heterochromatin (squiggled) region can be silenced (white) by spreading. (B–F) Eyes with variegated expression of *P{hsp26-pt-T}* transgene inserted into different chromosomal positions (rows) in different *sov* backgrounds (columns).

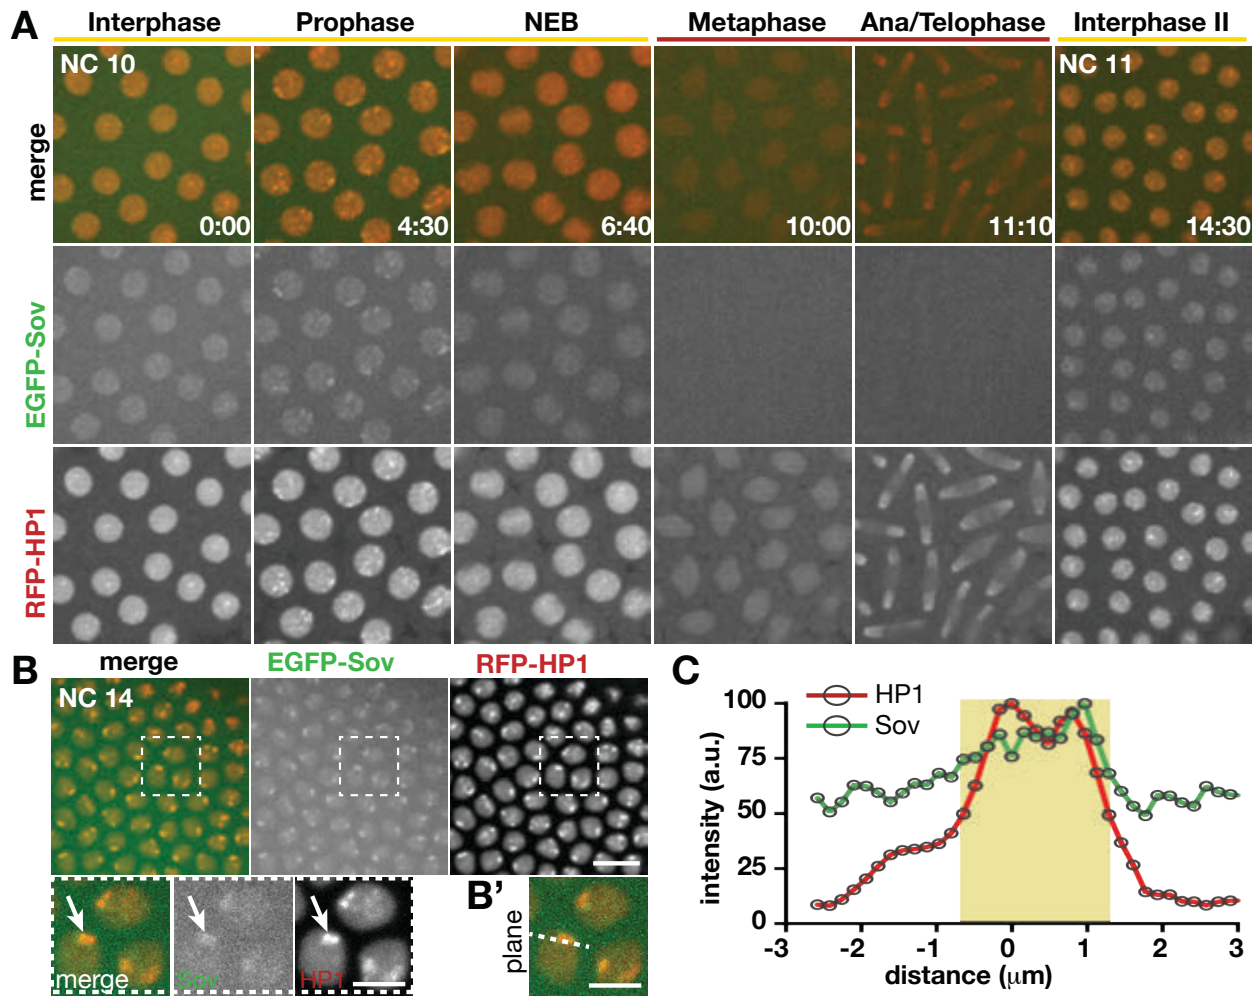

524  
525  
526  
527  
528  
529  
530  
531  
532  
533  
534  
535  
536  
537  
538  
539

**Figure 6. Sov colocalizes with HP1a.** Stills from live imaging of embryos expressing GFP-Sov and RFP-HP1a. (A) Localization of GFP-Sov and RFP-HP1a (rows) in stills from live imaging of an embryo expressing progressing from NC 10 (left) to NC 11 (right) with stages (columns, nuclear envelope breakdown=NEB) and time (min:s in merge row) shown. (B) expressing GFP-Sov and RFP-HP1a (columns) at NC 14. Boxed regions are magnified in insets below. An HP1a subnuclear domain is shown (arrows). (B') Single optical section containing peak HP1a fluorescence of the same region shown in (B). Dashed line indicates region used for linescan analysis. (A,B) Maximum projections through 1.5  $\mu\text{m}$  volume at 1F/30s. Bars: 10  $\mu\text{m}$ ; insets, 5  $\mu\text{m}$ . (C) Histogram of HP1a and Sov fluorescence intensity measured in (B'). Fluorescence levels (arbitrary units) normalized to the peak fluorescence intensity for each channel and the distance ( $\mu\text{m}$ ) to peak HP1a signal. Line scans were scaled  $-3$  to  $3\mu\text{m}$ , where 0.0 is peak HP1a fluorescence. Half maximum HP1a fluorescence is shown (yellow shade).

Benner\_Fig7

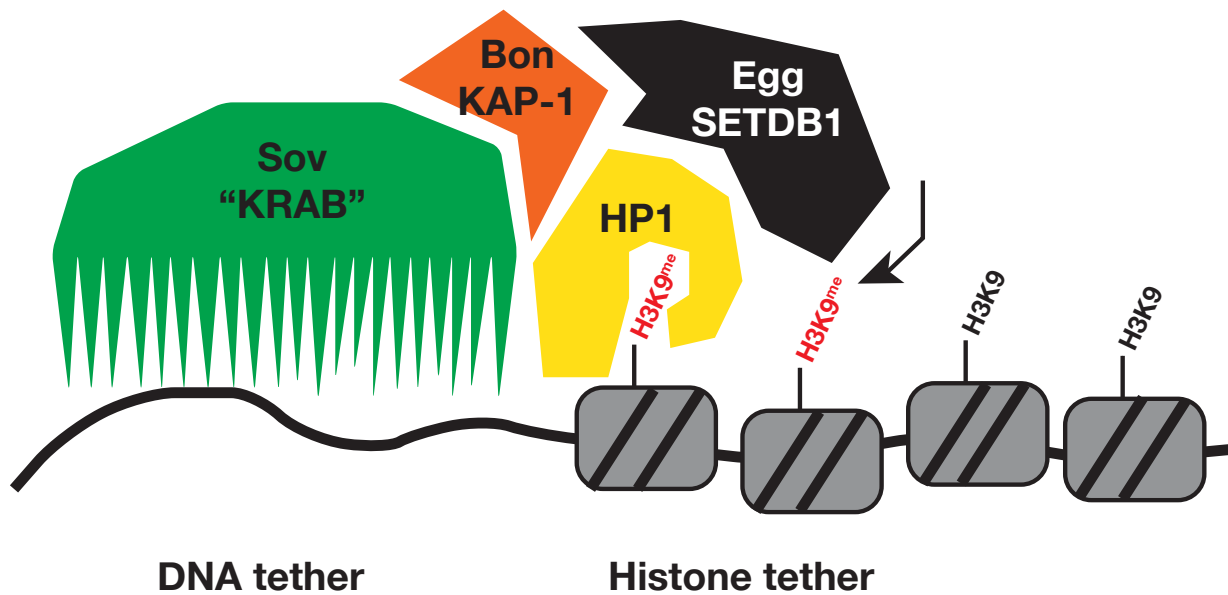

540  
541  
542  
543  
544  
545  
546

**Figure 7. Working model of *sov* function.** *Sov* protein function and attributes are analogous to the mammalian KRAB proteins (green). Like KRAB proteins, *Sov* is in complex with HP1a (yellow), Bon (mammalian KAP-1, orange) and Egg (mammalian SETDB1, black) providing a DNA tether that functions along with the H3K9me tether written by Egg (arrow, red lettering) and bound by HP1, to stabilize a repressed state.

547 **References**

- 548 Alekseyenko, Artyom A., Andrey A. Gorchakov, Barry M. Zee, Stephen M. Fuchs, Peter V. Kharchenko,  
549 and Mitzi I. Kuroda. 2014. "Heterochromatin-Associated Interactions of *Drosophila* HP1a with  
550 dADD1, HIP1, and Repetitive RNAs." *Genes & Development* 28 (13): 1445–60.
- 551 Anders, Simon, Paul Theodor Pyl, and Wolfgang Huber. 2015. "HTSeq--a Python Framework to Work  
552 with High-Throughput Sequencing Data." *Bioinformatics* 31 (2): 166–69.
- 553 Barton, Lacy J., Kaylee E. Lovander, Belinda S. Pinto, and Pamela K. Geyer. 2016. "Drosophila Male  
554 and Female Germline Stem Cell Niches Require the Nuclear Lamina Protein Otefin."  
555 *Developmental Biology* 415 (1): 75–86.
- 556 Bausek, Nina. 2013. "JAK-STAT Signaling in Stem Cells and Their Niches in *Drosophila*." *JAK-STAT* 2  
557 (3): e25686.
- 558 Beckstead, R. B., S. S. Ner, K. G. Hales, T. A. Grigliatti, B. S. Baker, and H. J. Bellen. 2005. "Bonus, a  
559 *Drosophila* TIF1 Homolog, Is a Chromatin-Associated Protein That Acts as a Modifier of Position-  
560 Effect Variegation." *Genetics* 169 (2): 783–94.
- 561 Bindea, Gabriela, Bernhard Mlecnik, Hubert Hackl, Pompimol Charoentong, Marie Tosolini, Amos  
562 Kirilovsky, Wolf-Herman Fridman, Franck Pagès, Zlatko Trajanoski, and Jérôme Galon. 2009.  
563 "ClueGO: A Cytoscape Plug-in to Decipher Functionally Grouped Gene Ontology and Pathway  
564 Annotation Networks." *Bioinformatics* 25 (8): 1091–93.
- 565 Börner, Kenneth, Dhawal Jain, Paula Vazquez-Pianzola, Sandra Vengadasalam, Natascha Steffen,  
566 Dmitry V. Fyodorov, Pavel Tomancak, Alexander Konev, Beat Suter, and Peter B. Becker. 2016.  
567 "A Role for Tuned Levels of Nucleosome Remodeler Subunit ACF1 during *Drosophila* Oogenesis."  
568 *Developmental Biology* 411 (2): 217–30.
- 569 Branco, Joana, Ismael Al-Ramahi, Lubna Ukani, Alma M. Pérez, Pedro Fernandez-Funez, Diego  
570 Rincón-Limas, and Juan Botas. 2008. "Comparative Analysis of Genetic Modifiers in *Drosophila*  
571 Points to Common and Distinct Mechanisms of Pathogenesis among Polyglutamine Diseases."

- 572 *Human Molecular Genetics* 17 (3): 376–90.
- 573 Brennecke, Julius, Alexei A. Aravin, Alexander Stark, Monica Dus, Manolis Kellis, Ravi  
574 Sachidanandam, and Gregory J. Hannon. 2007. “Discrete Small RNA-Generating Loci as Master  
575 Regulators of Transposon Activity in *Drosophila*.” *Cell* 128 (6): 1089–1103.
- 576 Brower-Toland, Brent, Seth D. Findley, Ling Jiang, Li Liu, Hang Yin, Monica Dus, Pei Zhou, Sarah C. R.  
577 Elgin, and Haifan Lin. 2007. “*Drosophila* PIWI Associates with Chromatin and Interacts Directly  
578 with HP1a.” *Genes & Development* 21 (18): 2300–2311.
- 579 Brown, James B., Nathan Boley, Robert Eisman, Gemma E. May, Marcus H. Stoiber, Michael O. Duff,  
580 Ben W. Booth, et al. 2014. “Diversity and Dynamics of the *Drosophila* Transcriptome.” *Nature* 512  
581 (7515): 393–99.
- 582 Brown, J. Lesley, Cornelia Fritsch, Jürg Mueller, and Judith A. Kassis. 2003. “The *Drosophila* Pho-like  
583 Gene Encodes a YY1-Related DNA Binding Protein That Is Redundant with Pleiohomeotic in  
584 Homeotic Gene Silencing.” *Development* 130 (2): 285–94.
- 585 Casper, Jonathan, Ann S. Zweig, Chris Villarreal, Cath Tyner, Matthew L. Speir, Kate R. Rosenbloom,  
586 Brian J. Raney, et al. 2018. “The UCSC Genome Browser Database: 2018 Update.” *Nucleic Acids*  
587 *Research* 46 (D1): D762–69.
- 588 Cenci, Giovanni, Laura Ciapponi, and Maurizio Gatti. 2005. “The Mechanism of Telomere Protection: A  
589 Comparison between *Drosophila* and Humans.” *Chromosoma* 114 (3): 135–45.
- 590 Charlesworth, B., and C. H. Langley. 1989. “The Population Genetics of *Drosophila* Transposable  
591 Elements.” *Annual Review of Genetics* 23: 251–87.
- 592 Chen, Shuyi, Su Wang, and Ting Xie. 2011. “Restricting Self-Renewal Signals within the Stem Cell  
593 Niche: Multiple Levels of Control.” *Current Opinion in Genetics & Development* 21 (6): 684–89.
- 594 Chen, Taiping, and Sharon Y. R. Dent. 2014. “Chromatin Modifiers and Remodellers: Regulators of  
595 Cellular Differentiation.” *Nature Reviews. Genetics* 15 (2): 93–106.
- 596 Chou, T. B., and N. Perrimon. 1996. “The Autosomal FLP-DFS Technique for Generating Germline  
597 Mosaics in *Drosophila Melanogaster*.” *Genetics* 144 (4): 1673–79.

- 598 Cingolani, Pablo, Adrian Platts, Le Lily Wang, Melissa Coon, Tung Nguyen, Luan Wang, Susan J.  
599 Land, Xiangyi Lu, and Douglas M. Ruden. 2012. "A Program for Annotating and Predicting the  
600 Effects of Single Nucleotide Polymorphisms, SnpEff: SNPs in the Genome of *Drosophila*  
601 *Melanogaster* Strain w1118; Iso-2; Iso-3." *Fly* 6 (2): 80–92.
- 602 Clark, R. F., and S. C. Elgin. 1992. "Heterochromatin Protein 1, a Known Suppressor of Position-Effect  
603 Variegation, Is Highly Conserved in *Drosophila*." *Nucleic Acids Research* 20 (22): 6067–74.
- 604 Clough, Emily, Woongjoon Moon, Shengxian Wang, Kathleen Smith, and Tulle Hazelrigg. 2007.  
605 "Histone Methylation Is Required for Oogenesis in *Drosophila*." *Development* 134 (1): 157–65.
- 606 Clough, Emily, Thomas Tedeschi, and Tulle Hazelrigg. 2014. "Epigenetic Regulation of Oogenesis and  
607 Germ Stem Cell Maintenance by the *Drosophila* Histone Methyltransferase *Eggless/dSetDB1*."  
608 *Developmental Biology* 388 (2): 181–91.
- 609 Cook, R. Kimberley, Stacey J. Christensen, Jennifer A. Deal, Rachel A. Coburn, Megan E. Deal, Jill M.  
610 Gresens, Thomas C. Kaufman, and Kevin R. Cook. 2012. "The Generation of Chromosomal  
611 Deletions to Provide Extensive Coverage and Subdivision of the *Drosophila Melanogaster*  
612 Genome." *Genome Biology* 13 (3): R21.
- 613 Court, Donald L., Srividya Swaminathan, Daiguan Yu, Helen Wilson, Teresa Baker, Mikail Bubunenکو,  
614 James Sawitzke, and Shyam K. Sharan. 2003. "Mini-Lambda: A Tractable System for  
615 Chromosome and BAC Engineering." *Gene* 315 (October): 63–69.
- 616 Di Stefano, Luisa, Jun-Yuan Ji, Nam-Sung Moon, Anabel Herr, and Nicholas Dyson. 2007. "Mutation of  
617 *Drosophila* *Lsd1* Disrupts H3-K4 Methylation, Resulting in Tissue-Specific Defects during  
618 Development." *Current Biology: CB* 17 (9): 808–12.
- 619 Ebert, Anja, Sandro Lein, Gunnar Schotta, and Gunter Reuter. 2006. "Histone Modification and the  
620 Control of Heterochromatic Gene Silencing in *Drosophila*." *Chromosome Research: An*  
621 *International Journal on the Molecular, Supramolecular and Evolutionary Aspects of Chromosome*  
622 *Biology* 14 (4): 377–92.
- 623 Ecco, Gabriela, Michael Imbeault, and Didier Trono. 2017. "KRAB Zinc Finger Proteins." *Development*

- 624 144 (15): 2719–29.
- 625 Eissenberg, J. C., T. C. James, D. M. Foster-Hartnett, T. Hartnett, V. Ngan, and S. C. Elgin. 1990.
- 626 “Mutation in a Heterochromatin-Specific Chromosomal Protein Is Associated with Suppression of
- 627 Position-Effect Variegation in *Drosophila Melanogaster*.” *Proceedings of the National Academy of*
- 628 *Sciences of the United States of America* 87 (24): 9923–27.
- 629 Elgin, Sarah C. R., and Gunter Reuter. 2013. “Position-Effect Variegation, Heterochromatin Formation,
- 630 and Gene Silencing in *Drosophila*.” *Cold Spring Harbor Perspectives in Biology* 5 (8): a017780.
- 631 Eliazer, Susan, Victor Palacios, Zhaohui Wang, Rahul K. Kollipara, Ralf Kittler, and Michael Buszczak.
- 632 2014. “Lsd1 Restricts the Number of Germline Stem Cells by Regulating Multiple Targets in Escort
- 633 Cells.” *PLoS Genetics* 10 (3): e1004200.
- 634 Eliazer, Susan, Nevine A. Shalaby, and Michael Buszczak. 2011. “Loss of Lysine-Specific Demethylase
- 635 1 Nonautonomously Causes Stem Cell Tumors in the *Drosophila* Ovary.” *Proceedings of the*
- 636 *National Academy of Sciences of the United States of America* 108 (17): 7064–69.
- 637 Foe, V. E., and B. M. Alberts. 1983. “Studies of Nuclear and Cytoplasmic Behaviour during the Five
- 638 Mitotic Cycles That Precede Gastrulation in *Drosophila* Embryogenesis.” *Journal of Cell Science*
- 639 61 (May): 31–70.
- 640 Fuller, Margaret T., and Allan C. Spradling. 2007. “Male and Female *Drosophila* Germline Stem Cells:
- 641 Two Versions of Immortality.” *Science* 316 (5823): 402–4.
- 642 Gene Ontology Consortium. 2015. “Gene Ontology Consortium: Going Forward.” *Nucleic Acids*
- 643 *Research* 43 (Database issue): D1049–56.
- 644 Gilboa, Lilach. 2015. “Organizing Stem Cell Units in the *Drosophila* Ovary.” *Current Opinion in Genetics*
- 645 *& Development* 32 (June): 31–36.
- 646 Goode, S., D. Wright, and A. P. Mahowald. 1992. “The Neurogenic Locus Brainiac Cooperates with the
- 647 *Drosophila* EGF Receptor to Establish the Ovarian Follicle and to Determine Its Dorsal-Ventral
- 648 Polarity.” *Development* 116 (1): 177–92.
- 649 Gramates, L. Sian, Steven J. Marygold, Gilberto Dos Santos, Jose-Maria Urbano, Giulia Antonazzo,



- 650 Beverley B. Matthews, Alix J. Rey, et al. 2017. “FlyBase at 25: Looking to the Future.” *Nucleic*  
651 *Acids Research* 45 (D1): D663–71.
- 652 Graveley, Brenton R., Angela N. Brooks, Joseph W. Carlson, Michael O. Duff, Jane M. Landolin, Li  
653 Yang, Carlo G. Artieri, et al. 2011. “The Developmental Transcriptome of *Drosophila*  
654 *Melanogaster*.” *Nature* 471 (7339): 473–79.
- 655 Gu, Tingting, and Sarah C. R. Elgin. 2013. “Maternal Depletion of Piwi, a Component of the RNAi  
656 System, Impacts Heterochromatin Formation in *Drosophila*.” *PLoS Genetics* 9 (9): e1003780.
- 657 Hsieh, M., Y. Tintut, and J. D. Gralla. 1994. “Functional Roles for the Glutamines within the Glutamine-  
658 Rich Region of the Transcription Factor Sigma 54.” *The Journal of Biological Chemistry* 269 (1):  
659 373–78.
- 660 Huang, Audrey M., E. Jay Rehm, and Gerald M. Rubin. 2009. “Quick Preparation of Genomic DNA  
661 from *Drosophila*.” *Cold Spring Harbor Protocols* 2009 (4): db.prot5198.
- 662 James, T. C., and S. C. Elgin. 1986. “Identification of a Nonhistone Chromosomal Protein Associated  
663 with Heterochromatin in *Drosophila Melanogaster* and Its Gene.” *Molecular and Cellular Biology* 6  
664 (11): 3862–72.
- 665 Jankovics, Ferenc, László Henn, Ágnes Bujna, Péter Vilmos, Kerstin Spirohn, Michael Boutros, and  
666 Miklós Erdélyi. 2014. “Functional Analysis of the *Drosophila* Embryonic Germ Cell Transcriptome  
667 by RNA Interference.” *PloS One* 9 (6): e98579.
- 668 Jenuwein, T., and C. D. Allis. 2001. “Translating the Histone Code.” *Science* 293 (5532): 1074–80.
- 669 Jiang, Lichun, Felix Schlesinger, Carrie A. Davis, Yu Zhang, Renhua Li, Marc Salit, Thomas R.  
670 Gingeras, and Brian Oliver. 2011. “Synthetic Spike-in Standards for RNA-Seq Experiments.”  
671 *Genome Research* 21 (9): 1543–51.
- 672 Kassis, Judith A., James A. Kennison, and John W. Tamkun. 2017. “Polycomb and Trithorax Group  
673 Genes in *Drosophila*.” *Genetics* 206 (4): 1699–1725.
- 674 Kent, W. James, Charles W. Sugnet, Terrence S. Furey, Krishna M. Roskin, Tom H. Pringle, Alan M.  
675 Zahler, and David Haussler. 2002. “The Human Genome Browser at UCSC.” *Genome Research*

- 676 12 (6): 996–1006.
- 677 Kim, Daehwan, Ben Langmead, and Steven L. Salzberg. 2015. “HISAT: A Fast Spliced Aligner with  
678 Low Memory Requirements.” *Nature Methods* 12 (4): 357–60.
- 679 Kouzarides, Tony. 2007. “Chromatin Modifications and Their Function.” *Cell* 128 (4): 693–705.
- 680 Lantz, V., J. S. Chang, J. I. Horabin, D. Bopp, and P. Schedl. 1994. “The Drosophila Orb RNA-Binding  
681 Protein Is Required for the Formation of the Egg Chamber and Establishment of Polarity.” *Genes &  
682 Development* 8 (5): 598–613.
- 683 Leader, David P., Sue A. Krause, Aniruddha Pandit, Shireen A. Davies, and Julian A. T. Dow. 2018.  
684 “FlyAtlas 2: A New Version of the Drosophila Melanogaster Expression Atlas with RNA-Seq,  
685 miRNA-Seq and Sex-Specific Data.” *Nucleic Acids Research* 46 (D1): D809–15.
- 686 Lee, Hangnoh, Dong-Yeon Cho, Cale Whitworth, Robert Eisman, Melissa Phelps, John Roote, Thomas  
687 Kaufman, et al. 2016. “Effects of Gene Dose, Chromatin, and Network Topology on Expression in  
688 Drosophila Melanogaster.” *PLoS Genetics* 12 (9): e1006295.
- 689 Lee, Hangnoh, P. Scott Pine, Jennifer McDaniel, Marc Salit, and Brian Oliver. 2016. “External RNA  
690 Controls Consortium Beta Version Update.” *Journal of Genomics* 4 (July): 19–22.
- 691 Lee, Jeannie T. 2009. “Lessons from X-Chromosome Inactivation: Long ncRNA as Guides and Tethers  
692 to the Epigenome.” *Genes & Development* 23 (16): 1831–42.
- 693 Lerit, Dorothy A., Holly A. Jordan, John S. Poulton, Carey J. Fagerstrom, Brian J. Galletta, Mark Peifer,  
694 and Nasser M. Rusan. 2015. “Interphase Centrosome Organization by the PLP-Cnn Scaffold Is  
695 Required for Centrosome Function.” *The Journal of Cell Biology* 210 (1): 79–97.
- 696 Li, Heng. 2011. “A Statistical Framework for SNP Calling, Mutation Discovery, Association Mapping and  
697 Population Genetical Parameter Estimation from Sequencing Data.” *Bioinformatics* 27 (21): 2987–  
698 93.
- 699 Li, Heng, Bob Handsaker, Alec Wysoker, Tim Fennell, Jue Ruan, Nils Homer, Gabor Marth, Goncalo  
700 Abecasis, Richard Durbin, and 1000 Genome Project Data Processing Subgroup. 2009. “The  
701 Sequence Alignment/Map Format and SAMtools.” *Bioinformatics* 25 (16): 2078–79.

- 702 Lin, H., and A. C. Spradling. 1995. "Fusome Asymmetry and Oocyte Determination in *Drosophila*."  
703 *Developmental Genetics* 16 (1): 6–12.
- 704 Li, Xuanying, Christopher W. Seidel, Leanne T. Szerszen, Jeffrey J. Lange, Jerry L. Workman, and  
705 Susan M. Abmayr. 2017. "Enzymatic Modules of the SAGA Chromatin-Modifying Complex Play  
706 Distinct Roles in *Drosophila* Gene Expression and Development." *Genes & Development* 31 (15):  
707 1588–1600.
- 708 Lorch, Yahli, and Roger D. Kornberg. 2017. "Chromatin-Remodeling for Transcription." *Quarterly*  
709 *Reviews of Biophysics* 50 (January): e5.
- 710 Love, Michael I., Wolfgang Huber, and Simon Anders. 2014. "Moderated Estimation of Fold Change  
711 and Dispersion for RNA-Seq Data with DESeq2." *Genome Biology* 15 (12): 550.
- 712 Mason, James M., Radmila Capkova Frydrychova, and Harald Biessmann. 2008. "*Drosophila*  
713 Telomeres: An Exception Providing New Insights." *BioEssays: News and Reviews in Molecular,*  
714 *Cellular and Developmental Biology* 30 (1): 25–37.
- 715 McConnell, Kristopher H., Michael Dixon, and Brian R. Calvi. 2012. "The Histone Acetyltransferases  
716 CBP and Chameau Integrate Developmental and DNA Replication Programs in *Drosophila*  
717 Ovarian Follicle Cells." *Development* 139 (20): 3880–90.
- 718 McKearin, D. M., and A. C. Spradling. 1990. "Bag-of-Marbles: A *Drosophila* Gene Required to Initiate  
719 Both Male and Female Gametogenesis." *Genes & Development* 4 (12B): 2242–51.
- 720 McKearin, D., and B. Ohlstein. 1995. "A Role for the *Drosophila* Bag-of-Marbles Protein in the  
721 Differentiation of Cystoblasts from Germline Stem Cells." *Development* 121 (9): 2937–47.
- 722 Mohler, Dawson, and Andrea Carroll. 1984. "Report of Dawson Mohler and Andrea Carroll." *Drosophila*  
723 *Information Service* 60 (June): 236–41.
- 724 Mohler, J. D. 1977. "Developmental Genetics of the *Drosophila* Egg. I. Identification of 59 Sex-Linked  
725 Cistrons with Maternal Effects on Embryonic Development." *Genetics* 85 (2): 259–72.
- 726 Ohlstein, B., and D. McKearin. 1997. "Ectopic Expression of the *Drosophila* Bam Protein Eliminates  
727 Oogenic Germline Stem Cells." *Development* 124 (18): 3651–62.

- 728 Orr-Weaver, T. L. 1991. "Drosophila Chorion Genes: Cracking the Eggshell's Secrets." *BioEssays: News and Reviews in Molecular, Cellular and Developmental Biology* 13 (3): 97–105.
- 729
- 730 Parks, Annette L., Kevin R. Cook, Marcia Belvin, Nicholas A. Dompe, Robert Fawcett, Kari Huppert, Lory R. Tan, et al. 2004. "Systematic Generation of High-Resolution Deletion Coverage of the Drosophila Melanogaster Genome." *Nature Genetics* 36 (3): 288–92.
- 731
- 732
- 733 Pelisson, A., L. Mejlumian, V. Robert, C. Terzian, and A. Bucheton. 2002. "Drosophila Germline Invasion by the Endogenous Retrovirus Gypsy: Involvement of the Viral Env Gene." *Insect Biochemistry and Molecular Biology* 32 (10): 1249–56.
- 734
- 735
- 736 Peng, Jamy C., Anton Valouev, Na Liu, and Haifan Lin. 2016. "Piwi Maintains Germline Stem Cells and Oogenesis in Drosophila through Negative Regulation of Polycomb Group Proteins." *Nature Genetics* 48 (3): 283–91.
- 737
- 738
- 739 Pine, P. Scott, Sarah A. Munro, Jerod R. Parsons, Jennifer McDaniel, Anne Bergstrom Lucas, Jean Lozach, Timothy G. Myers, Qin Su, Sarah M. Jacobs-Helber, and Marc Salit. 2016. "Evaluation of the External RNA Controls Consortium (ERCC) Reference Material Using a Modified Latin Square Design." *BMC Biotechnology* 16 (1): 54.
- 740
- 741
- 742
- 743 Quinlan, Aaron R., and Ira M. Hall. 2010. "BEDTools: A Flexible Suite of Utilities for Comparing Genomic Features." *Bioinformatics* 26 (6): 841–42.
- 744
- 745 R Core Team. 2017. "A Language and Environment for Statistical Computing." Vienna, Austria: R Foundation for Statistical Computing. <https://www.R-project.org/>.
- 746
- 747 Reuter, G., and P. Spierer. 1992. "Position Effect Variegation and Chromatin Proteins." *BioEssays: News and Reviews in Molecular, Cellular and Developmental Biology* 14 (9): 605–12.
- 748
- 749 Robinson, Scott W., Pawel Herzyk, Julian A. T. Dow, and David P. Leader. 2013. "FlyAtlas: Database of Gene Expression in the Tissues of Drosophila Melanogaster." *Nucleic Acids Research* 41 (Database issue): D744–50.
- 750
- 751
- 752 Rudolph, Thomas, Masato Yonezawa, Sandro Lein, Kathleen Heidrich, Stefan Kubicek, Christiane Schäfer, Sameer Phalke, et al. 2007. "Heterochromatin Formation in Drosophila Is Initiated through
- 753

- 754 Active Removal of H3K4 Methylation by the LSD1 Homolog SU(VAR)3-3.” *Molecular Cell* 26 (1):  
755 103–15.
- 756 Sambrook, Joseph, and David W. Russell. 2006. “Purification of Nucleic Acids by Extraction with  
757 Phenol:chloroform.” *CSH Protocols* 2006 (1). <https://doi.org/10.1101/pdb.prot4455>.
- 758 Shannon, Paul, Andrew Markiel, Owen Ozier, Nitin S. Baliga, Jonathan T. Wang, Daniel Ramage, Nada  
759 Amin, Benno Schwikowski, and Trey Ideker. 2003. “Cytoscape: A Software Environment for  
760 Integrated Models of Biomolecular Interaction Networks.” *Genome Research* 13 (11): 2498–2504.
- 761 Smit, Afa, R. Hubley, and P. Green. 2013-2015. “RepeatMasker Open-4.0.”  
762 <http://www.repeatmasker.org>.
- 763 Soshnev, Alexey A., Ryan M. Baxley, J. Robert Manak, Kai Tan, and Pamela K. Geyer. 2013. “The  
764 Insulator Protein Suppressor of Hairy-Wing Is an Essential Transcriptional Repressor in the  
765 *Drosophila* Ovary.” *Development* 140 (17): 3613–23.
- 766 Stork, Tobias, Amy Sheehan, Ozge E. Tasdemir-Yilmaz, and Marc R. Freeman. 2014. “Neuron-Glia  
767 Interactions through the Heartless FGF Receptor Signaling Pathway Mediate Morphogenesis of  
768 *Drosophila* Astrocytes.” *Neuron* 83 (2): 388–403.
- 769 Teixeira, Felipe Karam, Martyna Okuniewska, Colin D. Malone, Rémi-Xavier Coux, Donald C. Rio, and  
770 Ruth Lehmann. 2017. “piRNA-Mediated Regulation of Transposon Alternative Splicing in the Soma  
771 and Germ Line.” *Nature* 552 (7684): 268–72.
- 772 Venken, Koen J. T., Joseph W. Carlson, Karen L. Schulze, Hongling Pan, Yuchun He, Rebecca  
773 Spokony, Kenneth H. Wan, et al. 2009. “Versatile P[acman] BAC Libraries for Transgenesis  
774 Studies in *Drosophila Melanogaster*.” *Nature Methods* 6 (6): 431–34.
- 775 Venken, Koen J. T., Karen L. Schulze, Nele A. Haelterman, Hongling Pan, Yuchun He, Martha Evans-  
776 Holm, Joseph W. Carlson, et al. 2011. “MiMIC: A Highly Versatile Transposon Insertion Resource  
777 for Engineering *Drosophila Melanogaster* Genes.” *Nature Methods* 8 (9): 737–43.
- 778 Vermaak, Danielle, and Harmit S. Malik. 2009. “Multiple Roles for Heterochromatin Protein 1 Genes in  
779 *Drosophila*.” *Annual Review of Genetics* 43: 467–92.

- 780 Wang, Sidney H., and Sarah C. R. Elgin. 2011. "Drosophila Piwi Functions Downstream of piRNA  
781 Production Mediating a Chromatin-Based Transposon Silencing Mechanism in Female Germ Line."  
782 *Proceedings of the National Academy of Sciences of the United States of America* 108 (52):  
783 21164–69.
- 784 Wang, Xiaoxi, Lei Pan, Su Wang, Jian Zhou, William McDowell, Jungeun Park, Jeff Haug, Karen  
785 Staehling, Hong Tang, and Ting Xie. 2011. "Histone H3K9 Trimethylase Eggless Controls  
786 Germline Stem Cell Maintenance and Differentiation." *PLoS Genetics* 7 (12): e1002426.
- 787 Warming, Søren, Nina Costantino, Donald L. Court, Nancy A. Jenkins, and Neal G. Copeland. 2005.  
788 "Simple and Highly Efficient BAC Recombineering Using galk Selection." *Nucleic Acids Research*  
789 33 (4): e36.
- 790 Wayne, S., K. Liggett, J. Pettus, and R. N. Nagoshi. 1995. "Genetic Characterization of Small Ovaries,  
791 a Gene Required in the Soma for the Development of the Drosophila Ovary and the Female  
792 Germline." *Genetics* 139 (3): 1309–20.
- 793 Weiler, K. S., and B. T. Wakimoto. 1995. "Heterochromatin and Gene Expression in Drosophila."  
794 *Annual Review of Genetics* 29: 577–605.
- 795 Yang, Peng, Yixuan Wang, and Todd S. Macfarlan. 2017. "The Role of KRAB-ZFPs in Transposable  
796 Element Repression and Mammalian Evolution." *Trends in Genetics: TIG* 33 (11): 871–81.
- 797 Yasuhara, Jiro C., and Barbara T. Wakimoto. 2006. "Oxymoron No More: The Expanding World of  
798 Heterochromatic Genes." *Trends in Genetics: TIG* 22 (6): 330–38.
- 799 Yin, Hang, and Haifan Lin. 2007. "An Epigenetic Activation Role of Piwi and a Piwi-Associated piRNA in  
800 *Drosophila Melanogaster*." *Nature* 450 (7167): 304–8.
- 801 Yoshioka, K., H. Honma, M. Zushi, S. Kondo, S. Togashi, T. Miyake, and T. Shiba. 1990. "Virus-like  
802 Particle Formation of Drosophila Copia through Autocatalytic Processing." *The EMBO Journal* 9  
803 (2): 535–41.
- 804 Yuan, Kai, and Patrick H. O'Farrell. 2016. "TALE-Light Imaging Reveals Maternally Guided,  
805 H3K9me2/3-Independent Emergence of Functional Heterochromatin in Drosophila Embryos."

806 *Genes & Development* 30 (5): 579–93.

807 Zook, Justin M., Daniel Samarov, Jennifer McDaniel, Shurjo K. Sen, and Marc Salit. 2012. “Synthetic

808 Spike-in Standards Improve Run-Specific Systematic Error Analysis for DNA and RNA

809 Sequencing.” *PloS One* 7 (7): e41356.

810 Zhimulev, Igor F., and Elena S. Belyaeva. 2003. “Intercalary Heterochromatin and Genetic Silencing.”

811 *BioEssays: News and Reviews in Molecular, Cellular and Developmental Biology* 25 (11): 1040–

812 51.
